# Supplementary material for: Regiospecific synthesis of tetrasubstituted phthalocyanines and their liquid crystalline order
Source: Royal Society of Chemistry journal article supplement (doi:10.1039/c5dt00076a), 2015-01-01

## SUPPORTING INFORMATION

### Regiospecific synthesis of tetrasubstituted phthalocyanines and their liquid crystalline order

5 Petru Apostol, Ahmed Bentaleb, Mbolotiana Rajoarivelo, Rodolphe Clérac, and Harald Bock

**Differential scanning calorimetry (DSC) thermograms (left)** (onset temperatures of melting and clearing transitions are given, with transition enthalpies. Scan rates: 10 K/min on first heating/cooling [red/black], 3 K/min on second heating/cooling [orange/grey])

10 and

**Powder X-ray diffraction spectra (right)** at different temperatures upon stepwise cooling from 160 to 25°C (the Miller indices indicated in brackets correspond to a column lattice of hexagonal/rectangular symmetry)

for compounds 3-7:

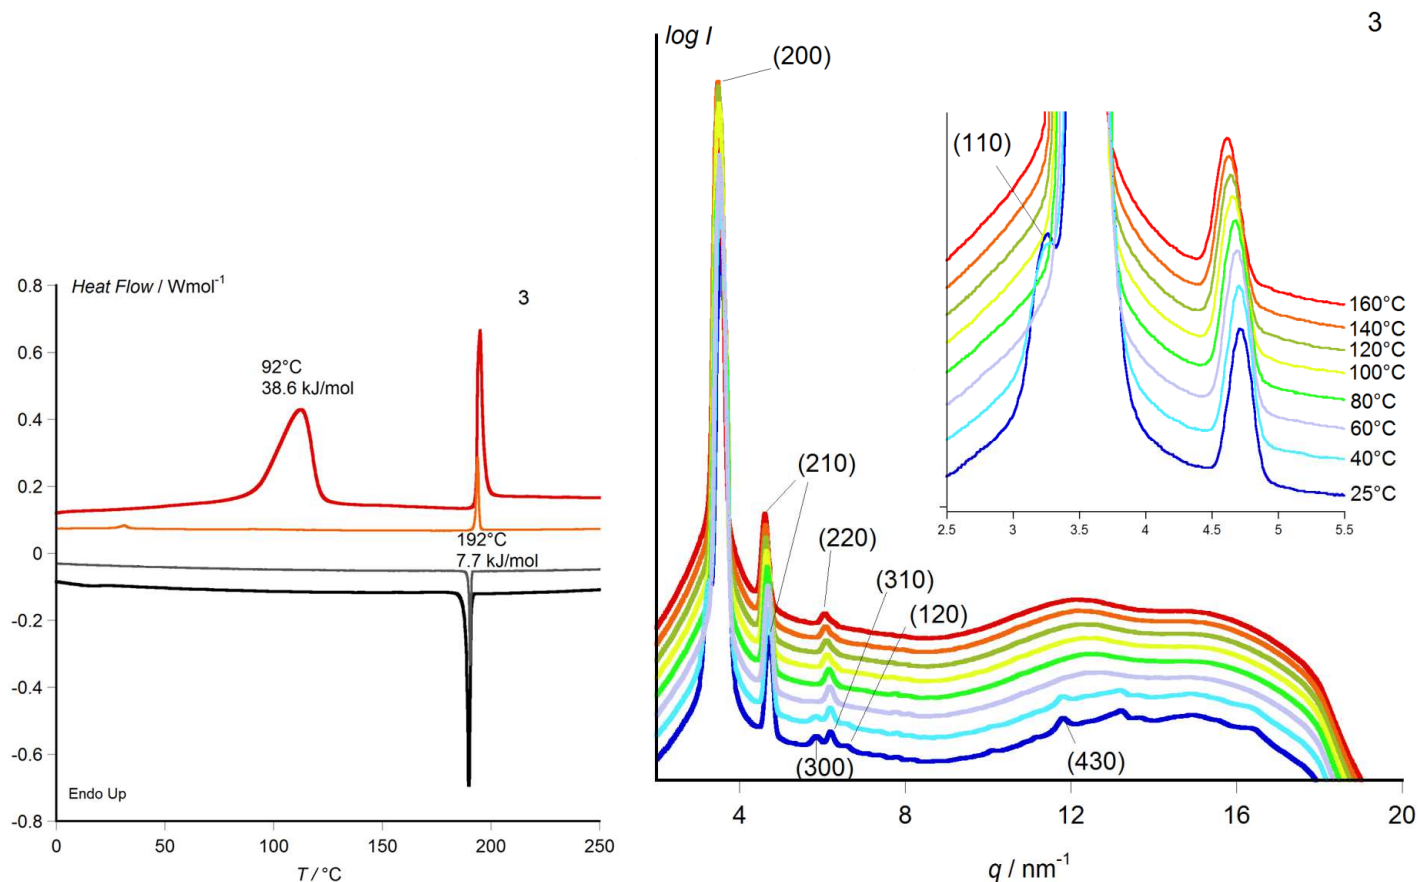

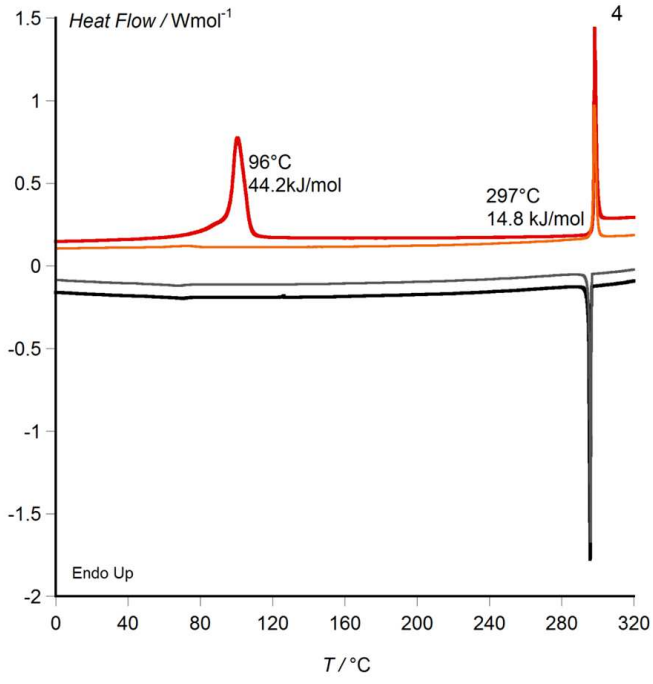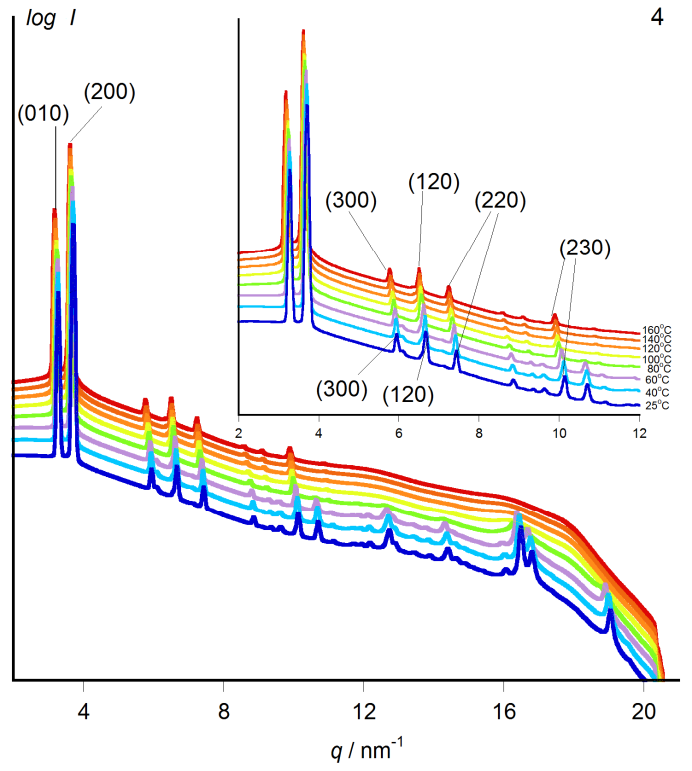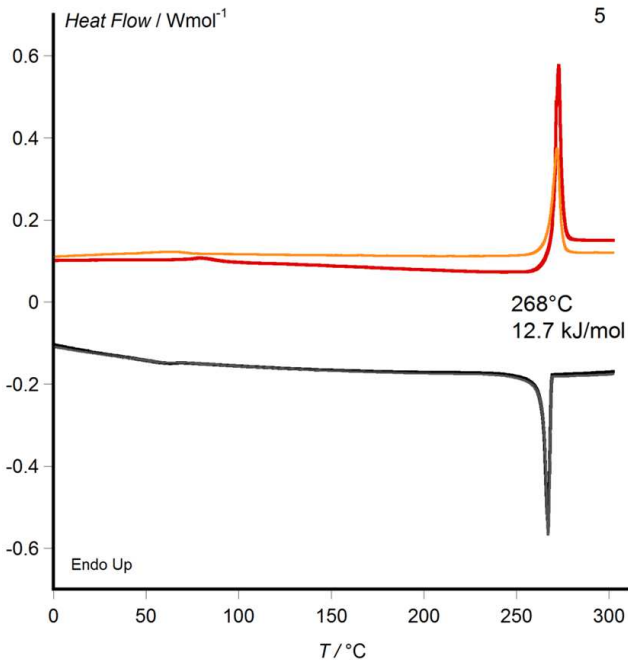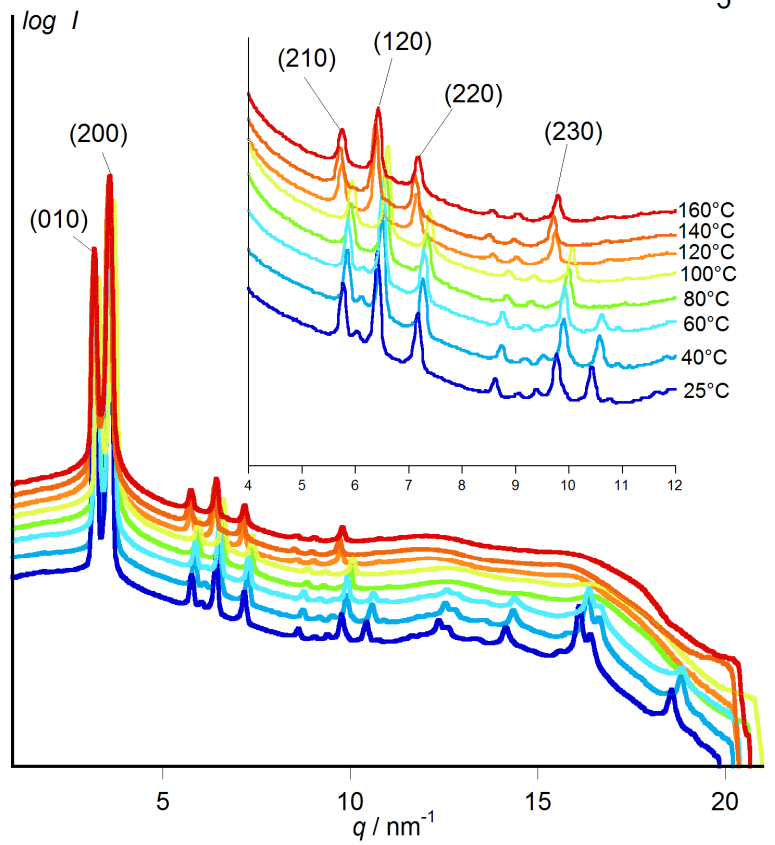

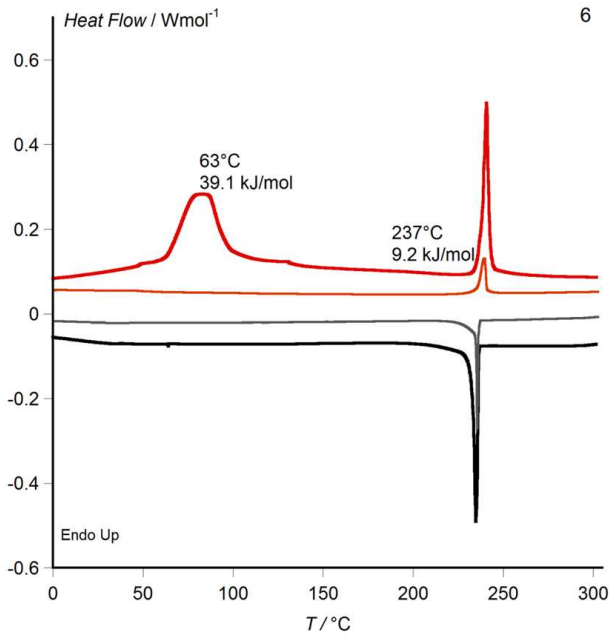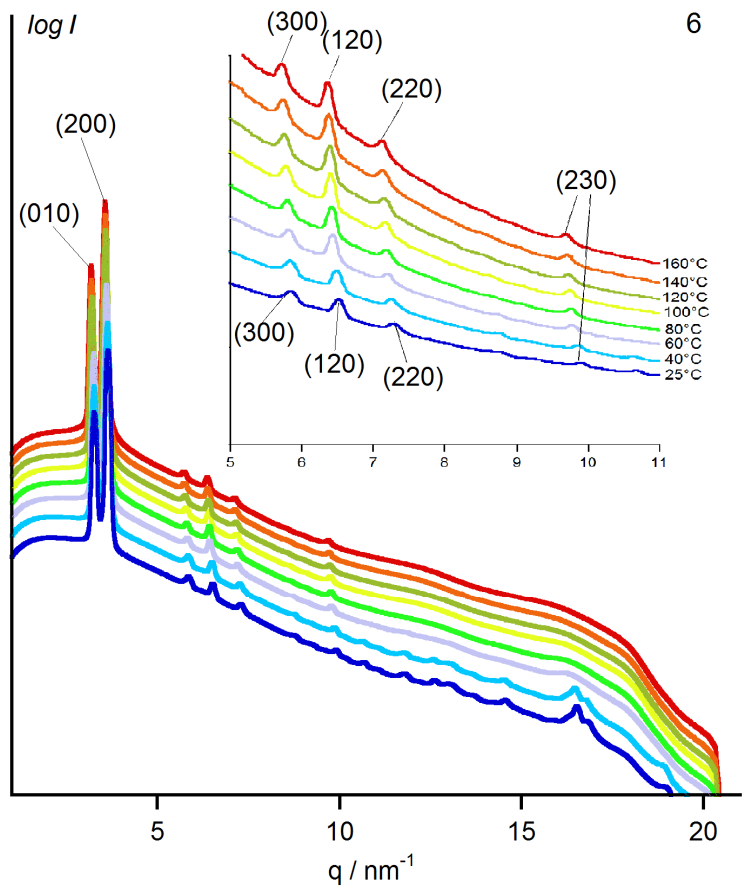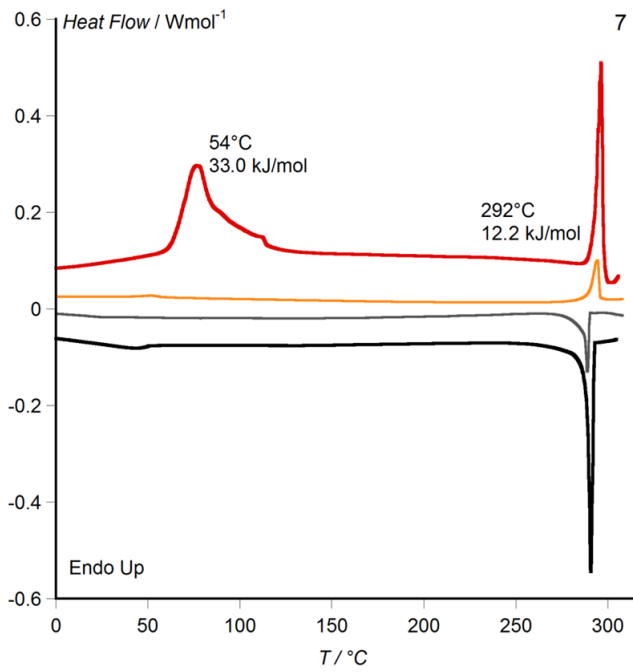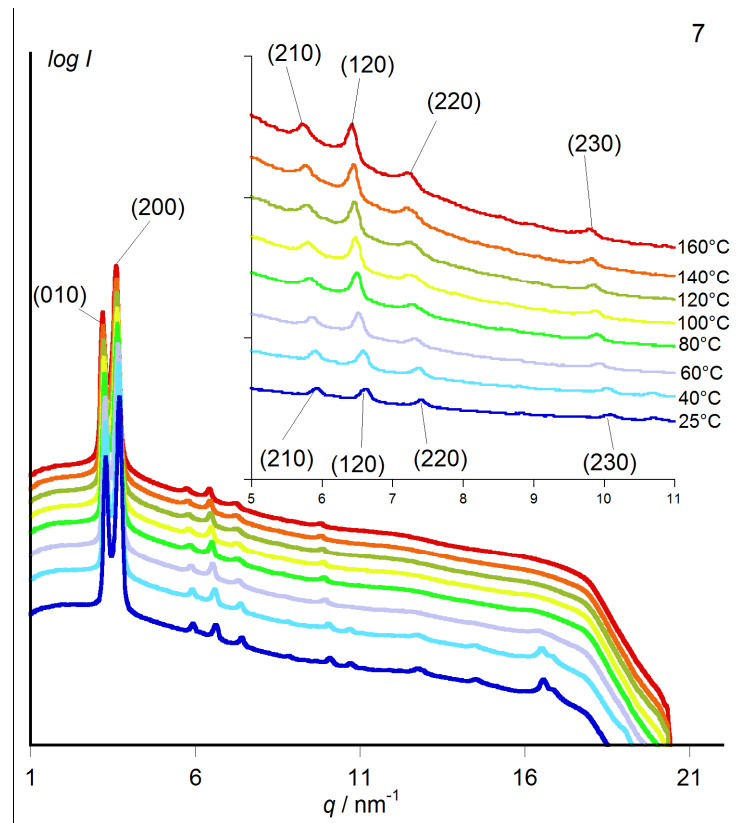

**$^1\text{H}$  NMR spectrum in DCM of compound 3:**

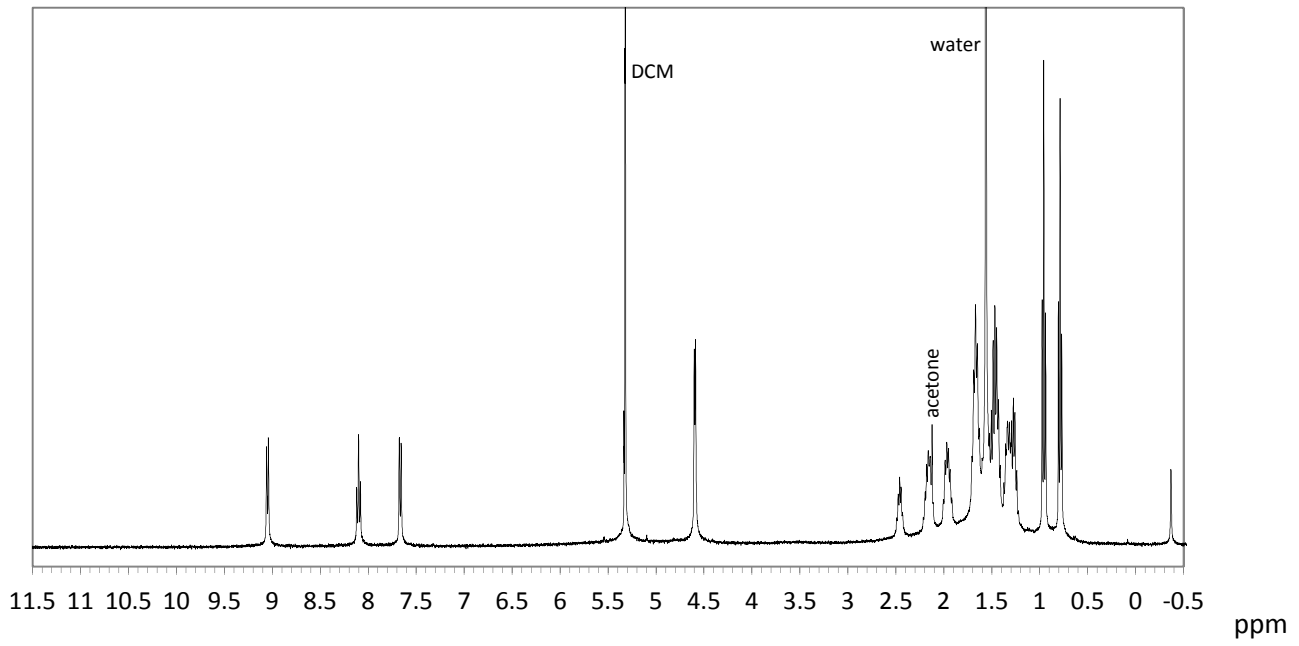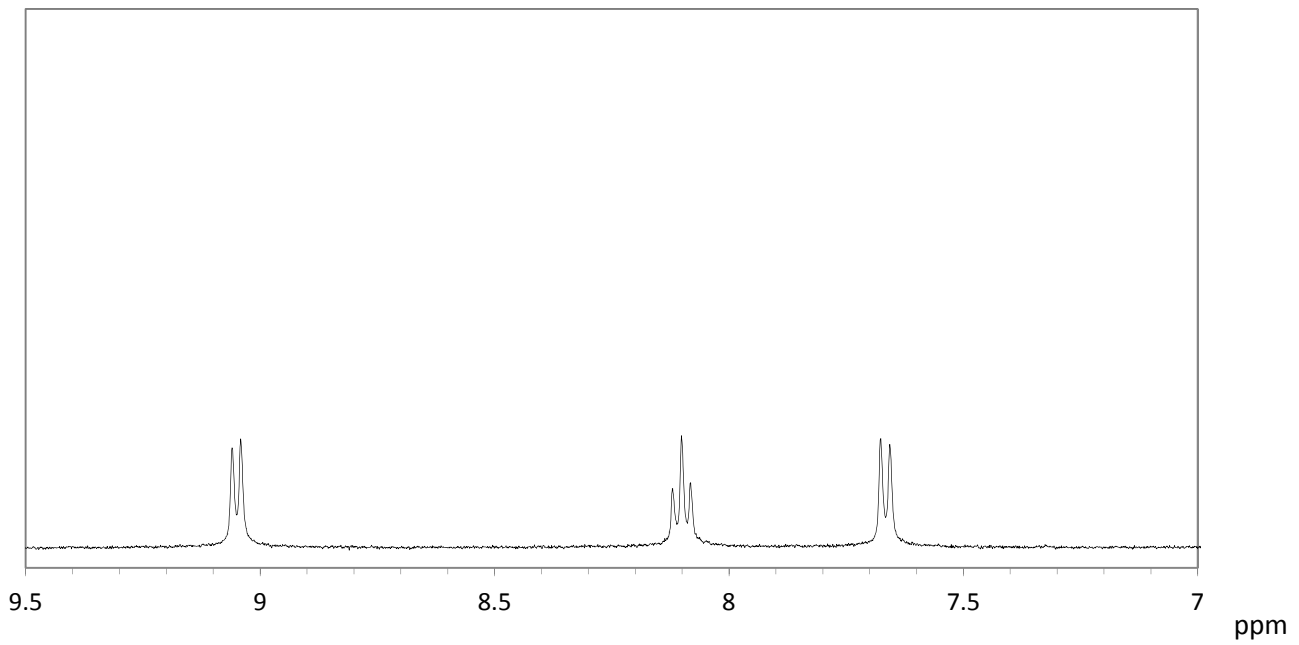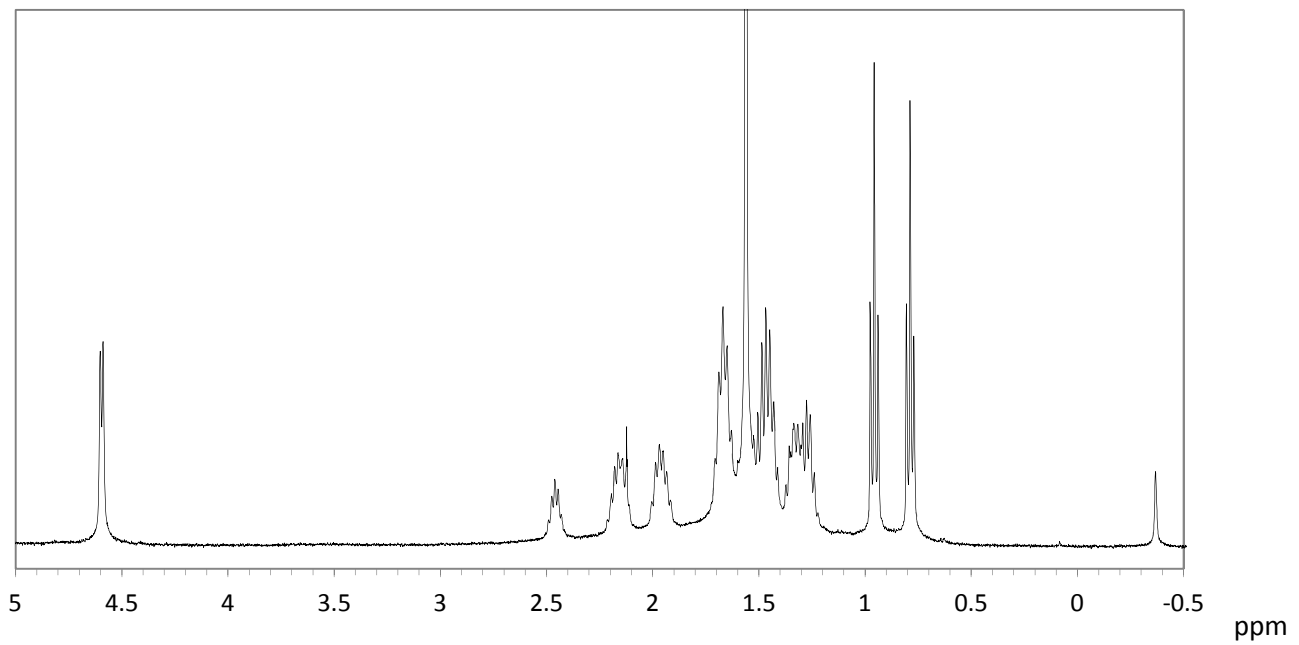

<sup>13</sup>C NMR spectrum in DCM of compound 3:

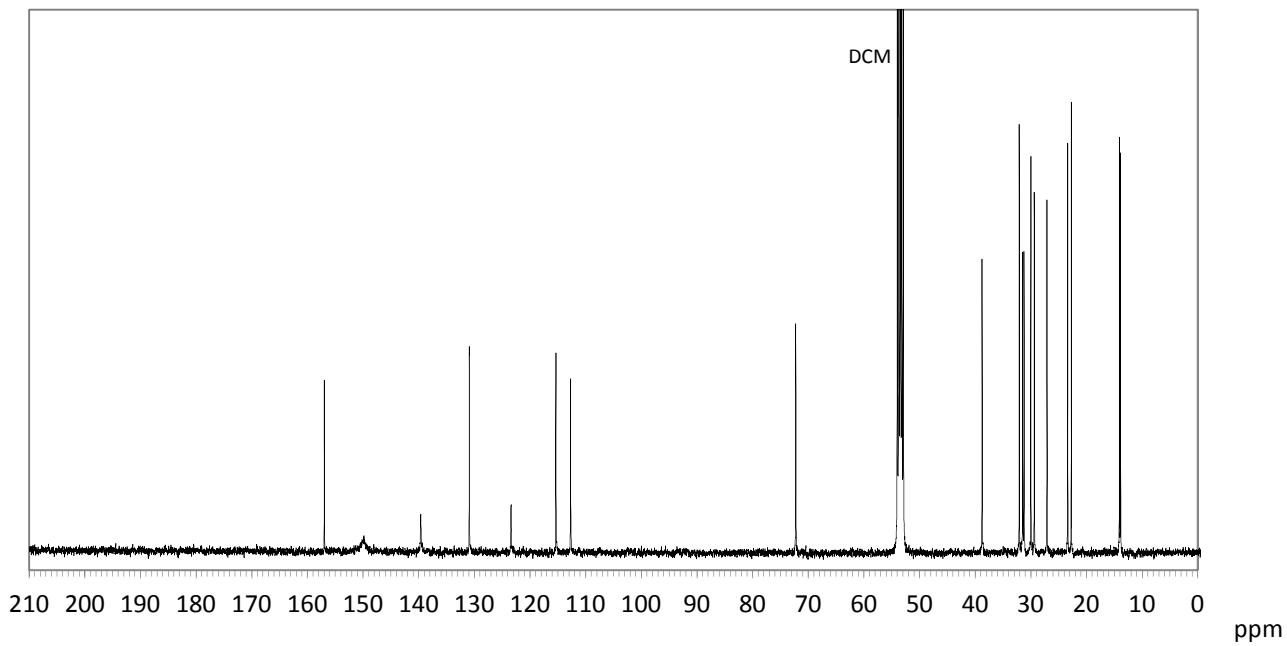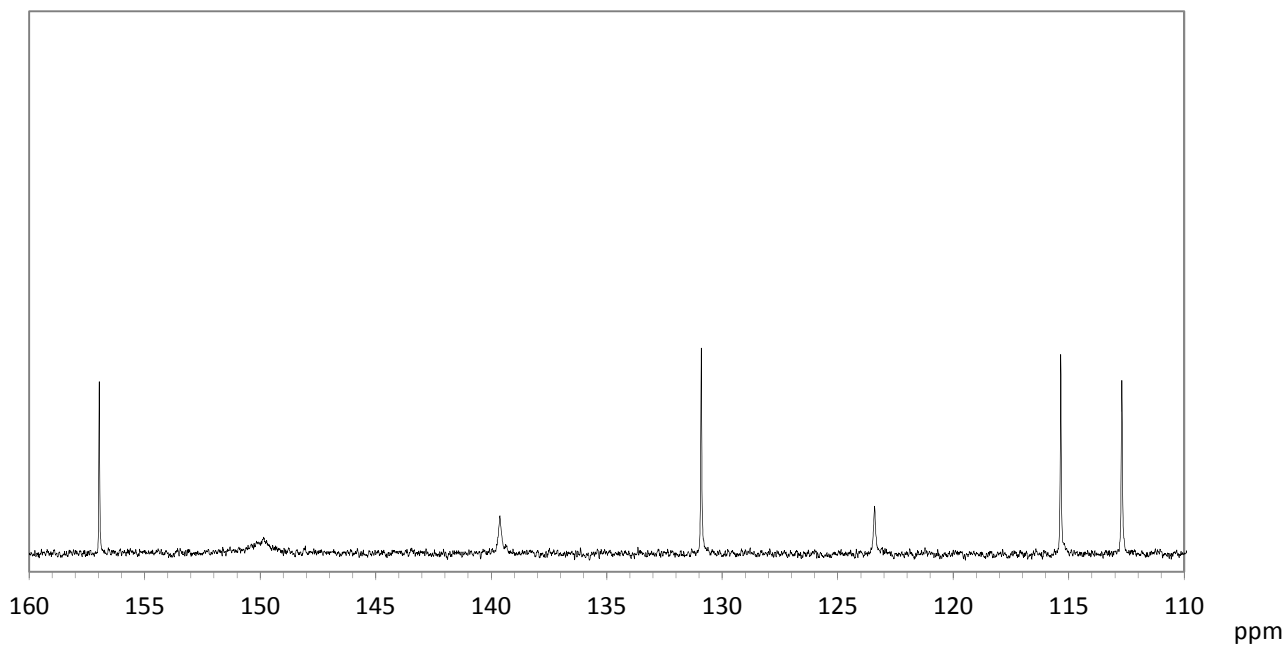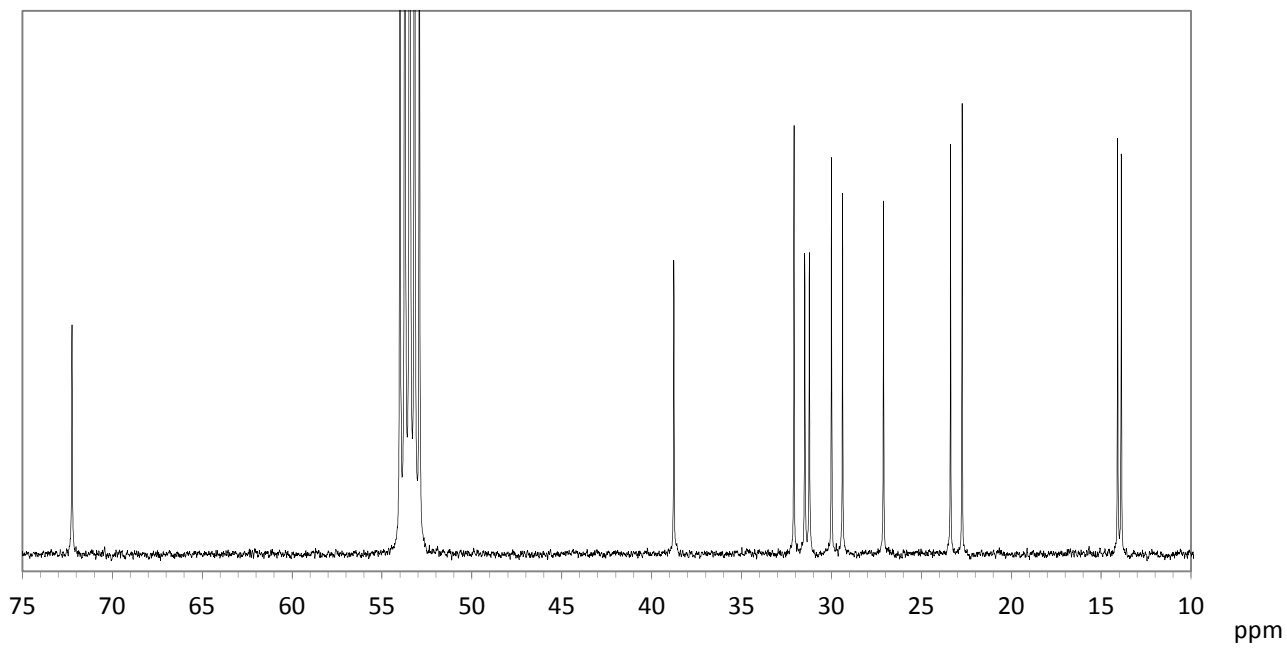

Supplement: c5dt00076a1.pdf [file c5dt00076a1.pdf]
